# Supplementary material for: ISGF3 and STAT2/IRF9 Direct Basal and IFN-Induced Transcription through Genome-Wide Binding of Phosphorylated and Unphosphorylated Complexes to Commonly ISRE Containing ISGs
Source: Preprints.org preprint supplement (doi:10.20944/preprints202310.1440.v1), 2023-10-23

SUPPLEMENTARY FIGURE 2

ISRE HOMER motif 178

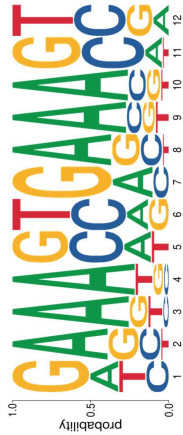

GAS HOMER motif 354

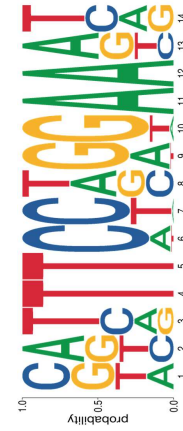

ISRE HOMER motif 179

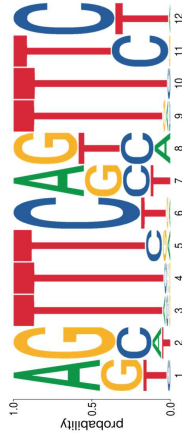

GAS HOMER motif 356

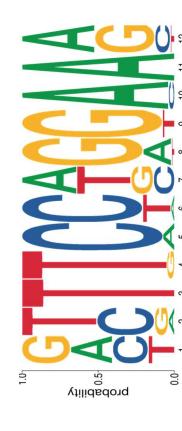

ISRE HOMER motif 181

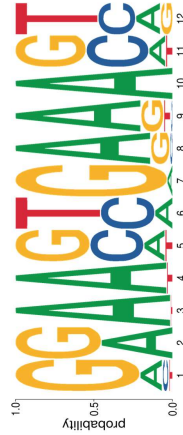

GAS HOMER motif 356

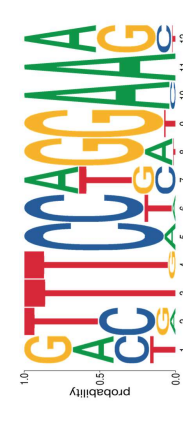

GAS HOMER deNovo motif 4

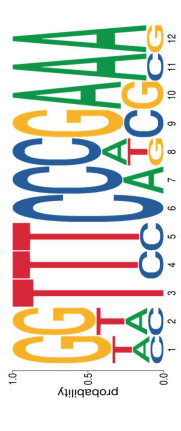

Supplement: Supplementary file 2 [file supplementary]
