# Supplementary figures and images for: ISGF3 and STAT2/IRF9 Direct Basal and IFN-Induced Transcription through Genome-Wide Binding of Phosphorylated and Unphosphorylated Complexes to Commonly ISRE Containing ISGs
Source: Preprints.org preprint supplement (doi:10.20944/preprints202310.1440.v1), 2023-10-23

# Supplementary Figure 1

**A** OAS2

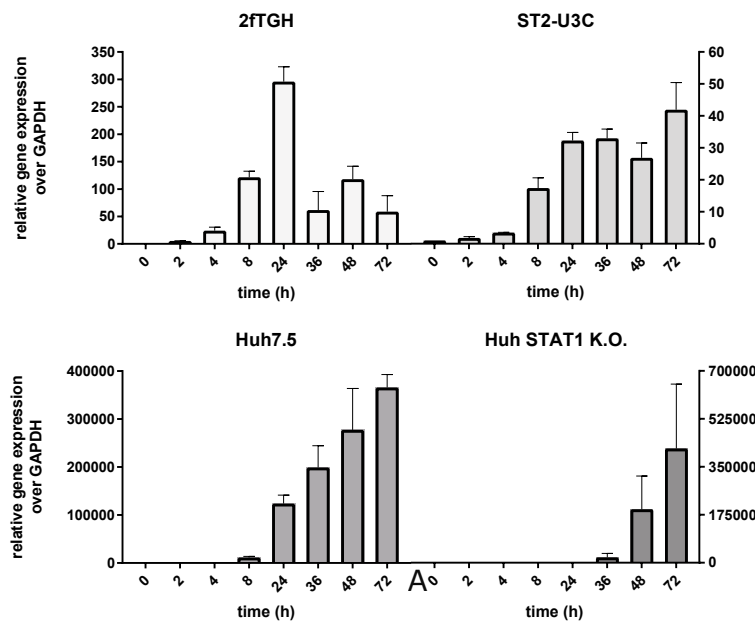

**B** IFIT1

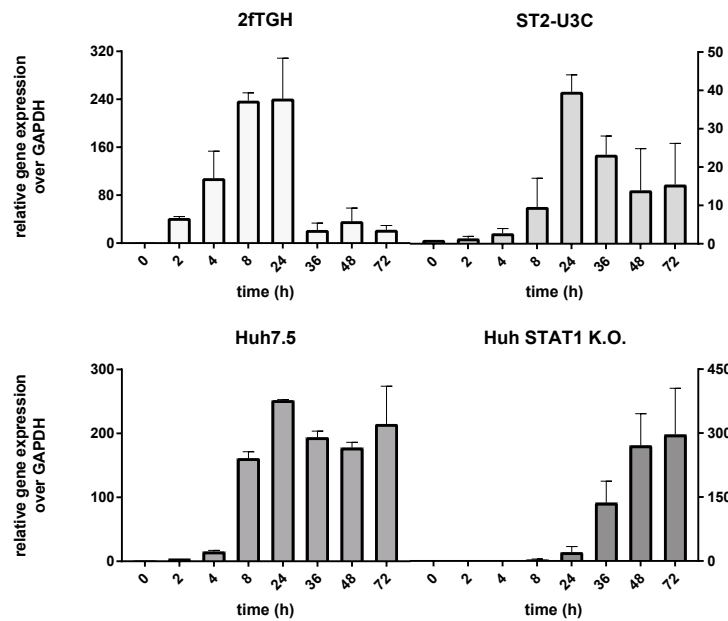

**C** IFI27

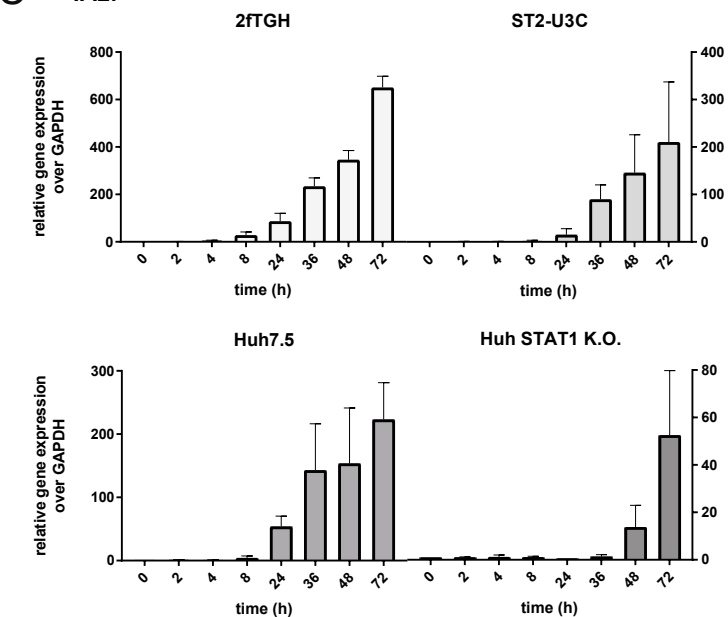

**D** IFI6

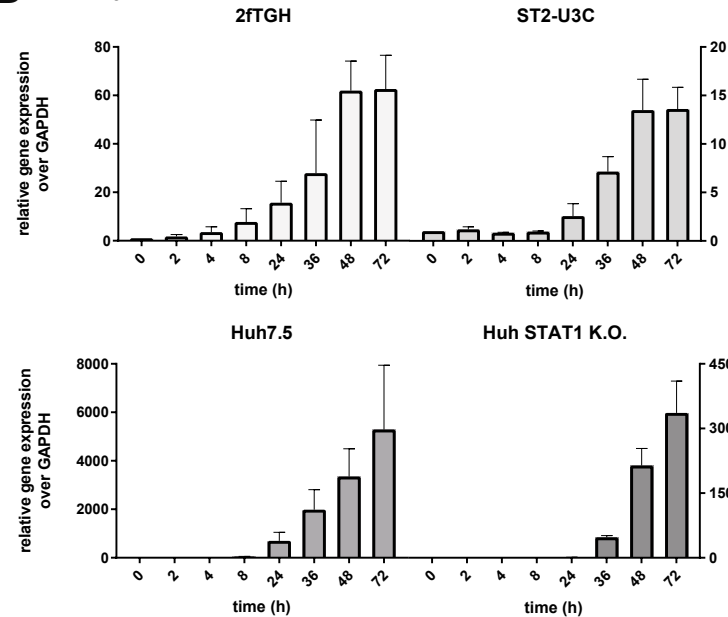

Supplement: Supplementary file 1 [file supplementary]

SUPPLEMENTARY FIGURE 3

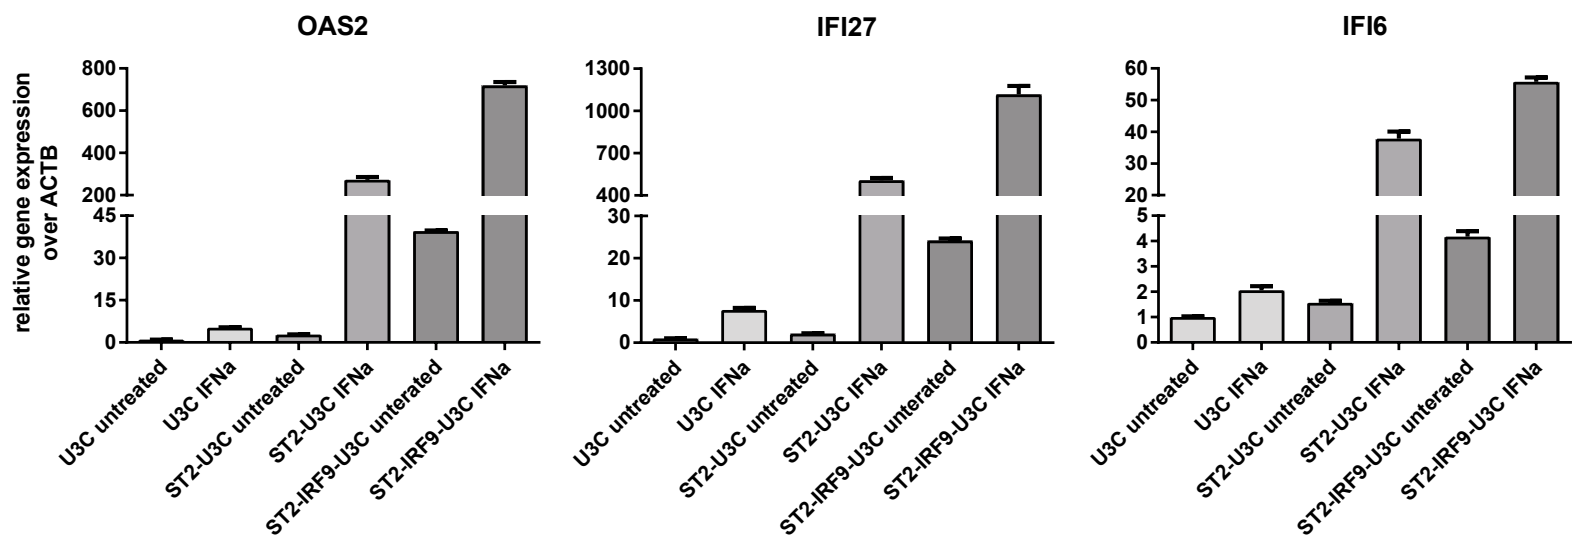

Supplement: Supplementary file 3 [file supplementary]
